# Supplementary material for: Preparation of magnesium silicate/carbon composite for adsorption of rhodamine B
Source: Royal Society of Chemistry journal article supplement (doi:10.1039/c7ra12848g), 2018-01-01
Supplement: c7ra12848g1.pdf [file c7ra12848g1.pdf]

## **Preparation of magnesium silicate/carbon composite for adsorption of rhodamine B**

Zhiwei Sun,<sup>ab</sup> Xinhui Duan<sup>ab</sup>, C. Srinivasakannan<sup>c</sup> and Jinsheng Liang<sup>\*ab</sup>

<sup>a</sup>Key Laboratory of Special Functional Materials for Ecological Environment and Information, Hebei University of Technology, Ministry of Education, Tianjin 300130, China.

<sup>b</sup>Institute of Power Source and Ecomaterials Science, Hebei University of Technology, Tianjin 300130, China.

<sup>c</sup>Chemical Engineering Department, Khalifa University of Science and Technology  
The petroleum Institute, Abu Dhabi, UAE

### **Exploratory experiment**

The composite without adding sodium acetate was prepared in the early exploring experiments. The adsorption result showed that the adsorption properties of this composite for rhodamine B improved only 6.41% than magnesium silicate. In other words, the improved effect is not obvious. The adsorption capacity significantly improved by adding sodium acetate into the raw materials.

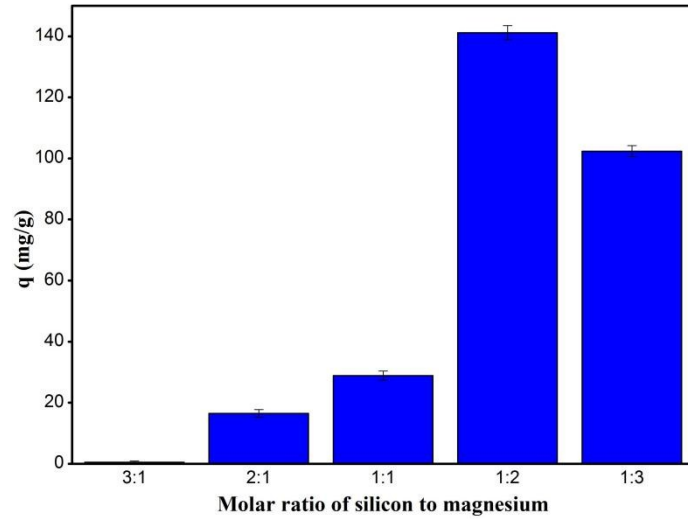

Fig. S1 Effects of Si/Mg molar ratio on the adsorption of RhB

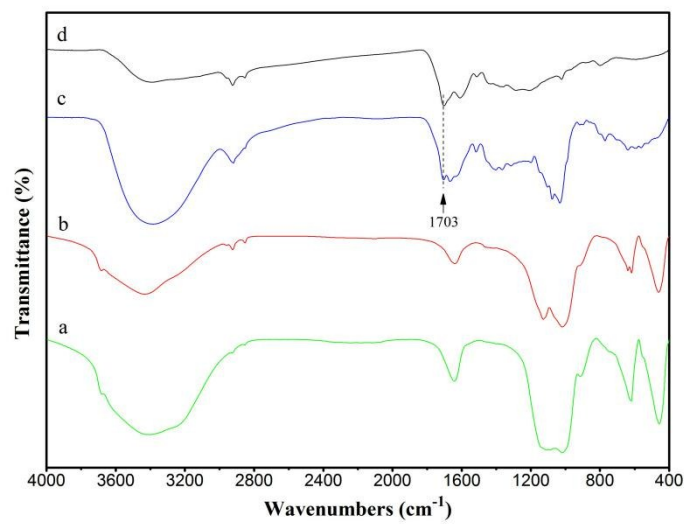

Fig. S2 FT-IR spectra of magnesium silicate (a), magnesium silicate added with sodium acetate (b), glucose hydrothermal carbon (c) and glucose hydrothermal carbon added with sodium acetate (d)
